# Supplementary material for: Novel Adeno-associated Viruses Derived From Pig Tissues Transduce Most Major Organs in Mice
Source: PubMed Central journal article supplement — Sci Rep. 2014 Oct 22;4:6644. doi: 10.1038/srep06644 (PMC4205840; doi:10.1038/srep06644), 2014-10-22
Supplement: srep06644-s1.pdf [file srep06644-s1.pdf]

# Novel Adeno-associated Viruses Derived From Pig Tissues Transduce Most Major Organs in Mice

Alexander Bello<sup>1,2</sup>, Allan Chand<sup>1,2</sup>, Jenna Aviles<sup>1,3</sup>, Geoff Soule<sup>1</sup>, Alberto Auricchio<sup>4,5</sup> and Gary P. Kobinger<sup>1,2,3</sup>

<sup>1</sup>Public Health Agency of Canada, National Microbiology Laboratory, Special Pathogens Program, Winnipeg, Canada, <sup>2</sup>University of Manitoba, Department of Medical Microbiology, <sup>3</sup>Department of Immunology, Winnipeg, Canada, <sup>4</sup>Telethon Institute of Genetics and Medicine, Naples, Italy, <sup>5</sup>Medical Genetics, Translational Medicine, “Federico II” University, Naples, Italy.

Running Head: Novel Pig AAVs Transduce Most Organs in Mice

**Corresponding author:**

Gary P. Kobinger, Ph.D.

1015 Arlington Street

Winnipeg, MB, R3E 3R2.

Canada

Phone: 204-784-5923

FAX: 204-789-2140

Email: [gary.kobinger@phac-aspc.gc.ca](mailto:gary.kobinger@phac-aspc.gc.ca)

Supplementary Table 1. Estimates of Evolutionary Divergence between Partial Cap Sequences

|               | 1     | 2     | 3     | 4     | 5     | 6     | 7     | 8     | 9     | 10    | 11    | 12    | 13    | 14    | 15    | 16    | 17    | 18    | 19    | 20    | 21    | 22    | 23    | 24    | 25    | 26    | 27    | 28    | 29    | 30    | 31    | 32    | 33    | 34    | 35    | 36    |  |  |  |  |
|---------------|-------|-------|-------|-------|-------|-------|-------|-------|-------|-------|-------|-------|-------|-------|-------|-------|-------|-------|-------|-------|-------|-------|-------|-------|-------|-------|-------|-------|-------|-------|-------|-------|-------|-------|-------|-------|--|--|--|--|
| 1 AAV2        |       |       |       |       |       |       |       |       |       |       |       |       |       |       |       |       |       |       |       |       |       |       |       |       |       |       |       |       |       |       |       |       |       |       |       |       |  |  |  |  |
| 2 AAV3        | 0.128 |       |       |       |       |       |       |       |       |       |       |       |       |       |       |       |       |       |       |       |       |       |       |       |       |       |       |       |       |       |       |       |       |       |       |       |  |  |  |  |
| 3 AAV5        | 0.409 | 0.393 |       |       |       |       |       |       |       |       |       |       |       |       |       |       |       |       |       |       |       |       |       |       |       |       |       |       |       |       |       |       |       |       |       |       |  |  |  |  |
| 4 AAV7        | 0.141 | 0.092 | 0.387 |       |       |       |       |       |       |       |       |       |       |       |       |       |       |       |       |       |       |       |       |       |       |       |       |       |       |       |       |       |       |       |       |       |  |  |  |  |
| 5 AAV8        | 0.128 | 0.096 | 0.398 | 0.037 |       |       |       |       |       |       |       |       |       |       |       |       |       |       |       |       |       |       |       |       |       |       |       |       |       |       |       |       |       |       |       |       |  |  |  |  |
| 6 AAV9        | 0.128 | 0.096 | 0.398 | 0.037 | 0.007 |       |       |       |       |       |       |       |       |       |       |       |       |       |       |       |       |       |       |       |       |       |       |       |       |       |       |       |       |       |       |       |  |  |  |  |
| 7 AAV6        | 0.132 | 0.092 | 0.398 | 0.052 | 0.060 | 0.060 |       |       |       |       |       |       |       |       |       |       |       |       |       |       |       |       |       |       |       |       |       |       |       |       |       |       |       |       |       |       |  |  |  |  |
| 8 AAVgo.1     | 0.409 | 0.393 | 0.000 | 0.387 | 0.398 | 0.398 | 0.398 |       |       |       |       |       |       |       |       |       |       |       |       |       |       |       |       |       |       |       |       |       |       |       |       |       |       |       |       |       |  |  |  |  |
| 9 AAVhu.9     | 0.030 | 0.108 | 0.420 | 0.141 | 0.145 | 0.145 | 0.141 | 0.420 |       |       |       |       |       |       |       |       |       |       |       |       |       |       |       |       |       |       |       |       |       |       |       |       |       |       |       |       |  |  |  |  |
| 10 AAVhu.11   | 0.018 | 0.108 | 0.415 | 0.137 | 0.132 | 0.132 | 0.128 | 0.415 | 0.011 |       |       |       |       |       |       |       |       |       |       |       |       |       |       |       |       |       |       |       |       |       |       |       |       |       |       |       |  |  |  |  |
| 11 AAVhu.27   | 0.011 | 0.120 | 0.415 | 0.145 | 0.132 | 0.132 | 0.132 | 0.415 | 0.041 | 0.030 |       |       |       |       |       |       |       |       |       |       |       |       |       |       |       |       |       |       |       |       |       |       |       |       |       |       |  |  |  |  |
| 12 AAVpo1     | 0.415 | 0.420 | 0.116 | 0.409 | 0.409 | 0.409 | 0.404 | 0.116 | 0.431 | 0.420 | 0.420 |       |       |       |       |       |       |       |       |       |       |       |       |       |       |       |       |       |       |       |       |       |       |       |       |       |  |  |  |  |
| 13 AAVpo4     | 0.224 | 0.238 | 0.257 | 0.210 | 0.220 | 0.220 | 0.220 | 0.257 | 0.233 | 0.229 | 0.220 | 0.266 |       |       |       |       |       |       |       |       |       |       |       |       |       |       |       |       |       |       |       |       |       |       |       |       |  |  |  |  |
| 14 AAVpo5     | 0.431 | 0.426 | 0.141 | 0.409 | 0.415 | 0.415 | 0.420 | 0.141 | 0.437 | 0.437 | 0.437 | 0.033 | 0.261 |       |       |       |       |       |       |       |       |       |       |       |       |       |       |       |       |       |       |       |       |       |       |       |  |  |  |  |
| 15 AAVpo6     | 0.210 | 0.233 | 0.257 | 0.215 | 0.224 | 0.224 | 0.220 | 0.257 | 0.220 | 0.215 | 0.206 | 0.266 | 0.011 | 0.266 |       |       |       |       |       |       |       |       |       |       |       |       |       |       |       |       |       |       |       |       |       |       |  |  |  |  |
| 16 AAVpo7     | 0.315 | 0.320 | 0.300 | 0.300 | 0.300 | 0.305 | 0.310 | 0.300 | 0.310 | 0.310 | 0.315 | 0.315 | 0.120 | 0.310 | 0.128 |       |       |       |       |       |       |       |       |       |       |       |       |       |       |       |       |       |       |       |       |       |  |  |  |  |
| 17 AAVpo8     | 0.315 | 0.320 | 0.295 | 0.300 | 0.300 | 0.305 | 0.310 | 0.295 | 0.310 | 0.310 | 0.315 | 0.305 | 0.128 | 0.305 | 0.137 | 0.030 |       |       |       |       |       |       |       |       |       |       |       |       |       |       |       |       |       |       |       |       |  |  |  |  |
| 18 AAVpo9     | 0.426 | 0.420 | 0.124 | 0.409 | 0.420 | 0.420 | 0.415 | 0.124 | 0.431 | 0.431 | 0.431 | 0.015 | 0.266 | 0.026 | 0.266 | 0.310 | 0.300 |       |       |       |       |       |       |       |       |       |       |       |       |       |       |       |       |       |       |       |  |  |  |  |
| 19 AAVpo10    | 0.431 | 0.426 | 0.120 | 0.409 | 0.420 | 0.420 | 0.420 | 0.120 | 0.437 | 0.437 | 0.437 | 0.018 | 0.266 | 0.022 | 0.271 | 0.310 | 0.300 | 0.015 |       |       |       |       |       |       |       |       |       |       |       |       |       |       |       |       |       |       |  |  |  |  |
| 20 AAVpo11    | 0.426 | 0.420 | 0.120 | 0.404 | 0.409 | 0.409 | 0.415 | 0.120 | 0.431 | 0.431 | 0.431 | 0.033 | 0.261 | 0.022 | 0.266 | 0.305 | 0.295 | 0.030 | 0.022 |       |       |       |       |       |       |       |       |       |       |       |       |       |       |       |       |       |  |  |  |  |
| 21 AAVpo12    | 0.431 | 0.426 | 0.141 | 0.409 | 0.415 | 0.415 | 0.420 | 0.141 | 0.437 | 0.437 | 0.437 | 0.033 | 0.261 | 0.000 | 0.266 | 0.310 | 0.305 | 0.026 | 0.022 | 0.022 |       |       |       |       |       |       |       |       |       |       |       |       |       |       |       |       |  |  |  |  |
| 22 AAVpo27    | 0.426 | 0.420 | 0.120 | 0.404 | 0.415 | 0.415 | 0.415 | 0.120 | 0.431 | 0.431 | 0.431 | 0.026 | 0.257 | 0.033 | 0.266 | 0.305 | 0.295 | 0.018 | 0.022 | 0.041 | 0.033 |       |       |       |       |       |       |       |       |       |       |       |       |       |       |       |  |  |  |  |
| 23 AAVpo28    | 0.415 | 0.409 | 0.108 | 0.398 | 0.409 | 0.409 | 0.404 | 0.108 | 0.420 | 0.420 | 0.420 | 0.022 | 0.257 | 0.033 | 0.257 | 0.300 | 0.290 | 0.018 | 0.015 | 0.011 | 0.033 | 0.033 |       |       |       |       |       |       |       |       |       |       |       |       |       |       |  |  |  |  |
| 24 AAVpo13    | 0.224 | 0.247 | 0.266 | 0.220 | 0.229 | 0.229 | 0.229 | 0.266 | 0.233 | 0.229 | 0.220 | 0.276 | 0.011 | 0.271 | 0.015 | 0.128 | 0.137 | 0.276 | 0.276 | 0.271 | 0.271 | 0.266 | 0.266 |       |       |       |       |       |       |       |       |       |       |       |       |       |  |  |  |  |
| 25 AAVpo14    | 0.315 | 0.315 | 0.295 | 0.290 | 0.290 | 0.295 | 0.305 | 0.295 | 0.310 | 0.310 | 0.315 | 0.310 | 0.124 | 0.305 | 0.128 | 0.022 | 0.033 | 0.305 | 0.305 | 0.300 | 0.305 | 0.305 | 0.295 | 0.132 |       |       |       |       |       |       |       |       |       |       |       |       |  |  |  |  |
| 26 AAVpo15    | 0.310 | 0.315 | 0.280 | 0.295 | 0.295 | 0.300 | 0.305 | 0.280 | 0.305 | 0.305 | 0.310 | 0.290 | 0.124 | 0.290 | 0.132 | 0.026 | 0.011 | 0.285 | 0.285 | 0.280 | 0.290 | 0.280 | 0.276 | 0.132 | 0.030 |       |       |       |       |       |       |       |       |       |       |       |  |  |  |  |
| 27 AAVpo16    | 0.206 | 0.242 | 0.261 | 0.220 | 0.229 | 0.229 | 0.224 | 0.261 | 0.215 | 0.210 | 0.201 | 0.271 | 0.026 | 0.271 | 0.022 | 0.124 | 0.132 | 0.271 | 0.276 | 0.271 | 0.271 | 0.271 | 0.261 | 0.030 | 0.124 | 0.128 |       |       |       |       |       |       |       |       |       |       |  |  |  |  |
| 28 AAVpo17    | 0.220 | 0.238 | 0.266 | 0.210 | 0.220 | 0.220 | 0.220 | 0.266 | 0.229 | 0.224 | 0.215 | 0.252 | 0.022 | 0.247 | 0.030 | 0.145 | 0.154 | 0.252 | 0.252 | 0.247 | 0.247 | 0.247 | 0.242 | 0.033 | 0.145 | 0.149 | 0.037 |       |       |       |       |       |       |       |       |       |  |  |  |  |
| 29 AAVpo18    | 0.315 | 0.320 | 0.276 | 0.300 | 0.300 | 0.305 | 0.310 | 0.276 | 0.310 | 0.310 | 0.315 | 0.285 | 0.128 | 0.285 | 0.137 | 0.030 | 0.015 | 0.280 | 0.280 | 0.276 | 0.285 | 0.276 | 0.271 | 0.137 | 0.033 | 0.011 | 0.132 | 0.154 |       |       |       |       |       |       |       |       |  |  |  |  |
| 30 AAVpo19    | 0.315 | 0.315 | 0.290 | 0.295 | 0.295 | 0.300 | 0.305 | 0.290 | 0.310 | 0.310 | 0.315 | 0.305 | 0.120 | 0.300 | 0.128 | 0.011 | 0.018 | 0.300 | 0.300 | 0.295 | 0.300 | 0.295 | 0.290 | 0.128 | 0.015 | 0.015 | 0.124 | 0.145 | 0.018 |       |       |       |       |       |       |       |  |  |  |  |
| 31 AAVpo20    | 0.295 | 0.305 | 0.285 | 0.285 | 0.285 | 0.290 | 0.295 | 0.285 | 0.290 | 0.290 | 0.295 | 0.295 | 0.116 | 0.295 | 0.120 | 0.030 | 0.022 | 0.290 | 0.290 | 0.285 | 0.295 | 0.290 | 0.280 | 0.124 | 0.030 | 0.018 | 0.116 | 0.137 | 0.022 | 0.026 |       |       |       |       |       |       |  |  |  |  |
| 32 AAVpo21    | 0.295 | 0.305 | 0.295 | 0.290 | 0.280 | 0.285 | 0.295 | 0.295 | 0.290 | 0.290 | 0.295 | 0.305 | 0.116 | 0.300 | 0.120 | 0.033 | 0.037 | 0.300 | 0.300 | 0.295 | 0.300 | 0.300 | 0.290 | 0.124 | 0.018 | 0.033 | 0.116 | 0.137 | 0.037 | 0.033 | 0.018 |       |       |       |       |       |  |  |  |  |
| 33 AAVpo23    | 0.426 | 0.420 | 0.120 | 0.409 | 0.420 | 0.420 | 0.415 | 0.120 | 0.431 | 0.431 | 0.431 | 0.007 | 0.266 | 0.026 | 0.266 | 0.310 | 0.300 | 0.007 | 0.011 | 0.026 | 0.026 | 0.026 | 0.015 | 0.276 | 0.305 | 0.285 | 0.271 | 0.252 | 0.280 | 0.300 | 0.290 | 0.300 |       |       |       |       |  |  |  |  |
| 34 AAVpo24    | 0.295 | 0.305 | 0.295 | 0.290 | 0.280 | 0.285 | 0.295 | 0.295 | 0.290 | 0.290 | 0.295 | 0.305 | 0.116 | 0.300 | 0.120 | 0.033 | 0.037 | 0.300 | 0.300 | 0.295 | 0.300 | 0.300 | 0.290 | 0.124 | 0.018 | 0.033 | 0.116 | 0.137 | 0.037 | 0.033 | 0.018 | 0.000 | 0.300 |       |       |       |  |  |  |  |
| 35 AAVpo25    | 0.431 | 0.426 | 0.145 | 0.409 | 0.415 | 0.415 | 0.420 | 0.145 | 0.437 | 0.437 | 0.437 | 0.037 | 0.261 | 0.004 | 0.266 | 0.310 | 0.305 | 0.030 | 0.026 | 0.026 | 0.004 | 0.037 | 0.037 | 0.271 | 0.305 | 0.290 | 0.271 | 0.247 | 0.285 | 0.300 | 0.295 | 0.300 | 0.030 | 0.300 |       |       |  |  |  |  |
| 36 AAVpo26    | 0.310 | 0.315 | 0.276 | 0.295 | 0.295 | 0.300 | 0.305 | 0.276 | 0.305 | 0.305 | 0.310 | 0.285 | 0.124 | 0.285 | 0.132 | 0.030 | 0.015 | 0.280 | 0.280 | 0.276 | 0.285 | 0.276 | 0.271 | 0.132 | 0.033 | 0.004 | 0.128 | 0.149 | 0.015 | 0.018 | 0.022 | 0.037 | 0.280 | 0.037 | 0.285 |       |  |  |  |  |
| 37 AAVth32.33 | 0.310 | 0.290 | 0.454 | 0.220 | 0.224 | 0.224 | 0.220 | 0.454 | 0.325 | 0.315 | 0.315 | 0.454 | 0.415 | 0.477 | 0.409 | 0.443 | 0.448 | 0.471 | 0.477 | 0.466 | 0.477 | 0.466 | 0.460 | 0.420 | 0.431 | 0.443 | 0.426 | 0.415 | 0.448 | 0.437 | 0.437 | 0.431 | 0.466 | 0.431 | 0.477 | 0.443 |  |  |  |  |

The number of amino acid substitutions per site from between sequences are shown. Analyses were conducted using the Poisson correction model. The analysis involved 37 amino acid sequences. All positions containing gaps and missing data were eliminated. There were a total of 274 positions in the final dataset. Evolutionary analyses were conducted in MEGA6.

**Supplementary Table 2. Estimates of Evolutionary Divergence between complete Cap Sequences**

|                     | 1     | 2     | 3     | 4     | 5     | 6     | 7     | 8     | 9     | 10    | 11    | 12    | 13    | 14    | 15    | 16    | 17    | 18    | 19    | 20    | 21    | 22    | 23    | 24    | 25    | 26    | 27    | 28 |
|---------------------|-------|-------|-------|-------|-------|-------|-------|-------|-------|-------|-------|-------|-------|-------|-------|-------|-------|-------|-------|-------|-------|-------|-------|-------|-------|-------|-------|----|
| 1 AAV1              |       |       |       |       |       |       |       |       |       |       |       |       |       |       |       |       |       |       |       |       |       |       |       |       |       |       |       |    |
| 2 AAV2              | 0.172 |       |       |       |       |       |       |       |       |       |       |       |       |       |       |       |       |       |       |       |       |       |       |       |       |       |       |    |
| 3 AAV3              | 0.133 | 0.131 |       |       |       |       |       |       |       |       |       |       |       |       |       |       |       |       |       |       |       |       |       |       |       |       |       |    |
| 4 AAV4              | 0.426 | 0.465 | 0.440 |       |       |       |       |       |       |       |       |       |       |       |       |       |       |       |       |       |       |       |       |       |       |       |       |    |
| 5 AAV5              | 0.501 | 0.503 | 0.498 | 0.586 |       |       |       |       |       |       |       |       |       |       |       |       |       |       |       |       |       |       |       |       |       |       |       |    |
| 6 AAV6              | 0.013 | 0.170 | 0.136 | 0.435 | 0.505 |       |       |       |       |       |       |       |       |       |       |       |       |       |       |       |       |       |       |       |       |       |       |    |
| 7 AAV7              | 0.150 | 0.176 | 0.151 | 0.426 | 0.491 | 0.153 |       |       |       |       |       |       |       |       |       |       |       |       |       |       |       |       |       |       |       |       |       |    |
| 8 AAV8              | 0.162 | 0.176 | 0.146 | 0.433 | 0.501 | 0.165 | 0.123 |       |       |       |       |       |       |       |       |       |       |       |       |       |       |       |       |       |       |       |       |    |
| 9 AAV9              | 0.153 | 0.160 | 0.151 | 0.437 | 0.510 | 0.158 | 0.125 | 0.082 |       |       |       |       |       |       |       |       |       |       |       |       |       |       |       |       |       |       |       |    |
| 10 AAV10            | 0.148 | 0.160 | 0.140 | 0.428 | 0.515 | 0.151 | 0.118 | 0.065 | 0.090 |       |       |       |       |       |       |       |       |       |       |       |       |       |       |       |       |       |       |    |
| 11 AAV11            | 0.382 | 0.433 | 0.422 | 0.199 | 0.571 | 0.391 | 0.376 | 0.395 | 0.395 | 0.387 |       |       |       |       |       |       |       |       |       |       |       |       |       |       |       |       |       |    |
| 12 AAV12            | 0.440 | 0.451 | 0.451 | 0.208 | 0.584 | 0.449 | 0.428 | 0.440 | 0.437 | 0.440 | 0.140 |       |       |       |       |       |       |       |       |       |       |       |       |       |       |       |       |    |
| 13 AAVgo.1          | 0.508 | 0.510 | 0.501 | 0.586 | 0.054 | 0.513 | 0.491 | 0.498 | 0.515 | 0.505 | 0.565 | 0.586 |       |       |       |       |       |       |       |       |       |       |       |       |       |       |       |    |
| 14 AAVhu.9          | 0.165 | 0.089 | 0.082 | 0.451 | 0.515 | 0.165 | 0.174 | 0.176 | 0.177 | 0.160 | 0.435 | 0.456 | 0.520 |       |       |       |       |       |       |       |       |       |       |       |       |       |       |    |
| 15 AAVhu.11         | 0.157 | 0.082 | 0.081 | 0.451 | 0.508 | 0.157 | 0.170 | 0.169 | 0.169 | 0.153 | 0.428 | 0.453 | 0.513 | 0.009 |       |       |       |       |       |       |       |       |       |       |       |       |       |    |
| 16 AAVhu.24         | 0.169 | 0.015 | 0.123 | 0.458 | 0.503 | 0.167 | 0.177 | 0.174 | 0.162 | 0.158 | 0.428 | 0.442 | 0.513 | 0.092 | 0.086 |       |       |       |       |       |       |       |       |       |       |       |       |    |
| 17 AAVhu.55         | 0.157 | 0.078 | 0.078 | 0.460 | 0.510 | 0.157 | 0.165 | 0.169 | 0.169 | 0.158 | 0.431 | 0.456 | 0.518 | 0.027 | 0.021 | 0.081 |       |       |       |       |       |       |       |       |       |       |       |    |
| 18 AAVhu.56         | 0.172 | 0.010 | 0.131 | 0.465 | 0.498 | 0.170 | 0.179 | 0.179 | 0.163 | 0.162 | 0.433 | 0.451 | 0.508 | 0.090 | 0.084 | 0.013 | 0.079 |       |       |       |       |       |       |       |       |       |       |    |
| 19 AAVpo1           | 0.491 | 0.498 | 0.496 | 0.594 | 0.136 | 0.496 | 0.484 | 0.496 | 0.498 | 0.501 | 0.571 | 0.602 | 0.113 | 0.491 | 0.484 | 0.498 | 0.493 | 0.498 |       |       |       |       |       |       |       |       |       |    |
| 20 AAVpo2.1         | 0.222 | 0.172 | 0.204 | 0.491 | 0.460 | 0.222 | 0.220 | 0.213 | 0.211 | 0.224 | 0.491 | 0.498 | 0.470 | 0.197 | 0.193 | 0.172 | 0.191 | 0.176 | 0.447 |       |       |       |       |       |       |       |       |    |
| 21 AAVpo4           | 0.215 | 0.191 | 0.208 | 0.496 | 0.449 | 0.217 | 0.217 | 0.217 | 0.211 | 0.228 | 0.491 | 0.501 | 0.453 | 0.206 | 0.202 | 0.193 | 0.200 | 0.199 | 0.431 | 0.068 |       |       |       |       |       |       |       |    |
| 22 AAVpo5           | 0.518 | 0.505 | 0.496 | 0.589 | 0.126 | 0.525 | 0.496 | 0.491 | 0.508 | 0.505 | 0.571 | 0.597 | 0.115 | 0.508 | 0.503 | 0.505 | 0.508 | 0.505 | 0.076 | 0.453 | 0.431 |       |       |       |       |       |       |    |
| 23 AAVpo6           | 0.218 | 0.179 | 0.202 | 0.491 | 0.456 | 0.226 | 0.224 | 0.215 | 0.215 | 0.226 | 0.472 | 0.486 | 0.463 | 0.200 | 0.197 | 0.177 | 0.193 | 0.183 | 0.456 | 0.050 | 0.082 | 0.449 |       |       |       |       |       |    |
| 24 AAVpo7           | 0.252 | 0.218 | 0.233 | 0.513 | 0.477 | 0.254 | 0.252 | 0.242 | 0.237 | 0.248 | 0.503 | 0.515 | 0.486 | 0.235 | 0.233 | 0.222 | 0.231 | 0.222 | 0.470 | 0.084 | 0.121 | 0.472 | 0.100 |       |       |       |       |    |
| 25 AAVpo8           | 0.447 | 0.440 | 0.424 | 0.545 | 0.496 | 0.447 | 0.428 | 0.431 | 0.444 | 0.451 | 0.520 | 0.533 | 0.508 | 0.431 | 0.426 | 0.437 | 0.435 | 0.442 | 0.501 | 0.365 | 0.363 | 0.501 | 0.359 | 0.300 |       |       |       |    |
| 26 AAVrh.32.33      | 0.380 | 0.431 | 0.419 | 0.199 | 0.568 | 0.389 | 0.374 | 0.393 | 0.393 | 0.384 | 0.001 | 0.138 | 0.563 | 0.433 | 0.426 | 0.426 | 0.428 | 0.431 | 0.568 | 0.489 | 0.489 | 0.571 | 0.470 | 0.503 | 0.520 |       |       |    |
| 27 BAAV             | 0.474 | 0.498 | 0.486 | 0.246 | 0.548 | 0.484 | 0.477 | 0.501 | 0.501 | 0.486 | 0.229 | 0.242 | 0.530 | 0.491 | 0.491 | 0.489 | 0.496 | 0.498 | 0.545 | 0.460 | 0.460 | 0.543 | 0.442 | 0.463 | 0.484 | 0.229 |       |    |
| 28 goose_parvovirus | 0.550 | 0.558 | 0.538 | 0.589 | 0.573 | 0.555 | 0.538 | 0.525 | 0.548 | 0.533 | 0.597 | 0.608 | 0.565 | 0.565 | 0.558 | 0.548 | 0.560 | 0.555 | 0.573 | 0.571 | 0.573 | 0.565 | 0.565 | 0.589 | 0.608 | 0.597 | 0.594 |    |

The number of amino acid substitutions per site from between sequences are shown. Analyses were conducted using the Poisson correction model. The analysis involved 28 amino acid sequences. All positions containing gaps and missing data were eliminated. There were a total of 683 positions in the final dataset. Evolutionary analyses were conducted in MEGA6.

Supplementary Table 3: Biodistribution of Systemically Delivered AAV in Mouse Tissues

| Organ      | AAVpo2.1   | AAVpo4       | AAVpo5     | AAVpo6       | AAV5        | AAV8         | PBS        |
|------------|------------|--------------|------------|--------------|-------------|--------------|------------|
| Spleen     | 1.644±.058 | 1.322±.143   | 0.032±.013 | 0.549±.279   | 1.638±1.113 | 2.353±1.273  | 0.002±.001 |
| Heart      | 0.043±.006 | 1.284±.235   | 0.030±.010 | 0.441±.089   | 0.034±.010  | 0.335±.057   | 0.006±.002 |
| Lung       | 0.046±.006 | 1.466±.284   | 0.026±.002 | 1.325±.323   | 1.700±.791  | 0.210±.056   | 0.022±.018 |
| Liver      | 0.044±.006 | 61.859±4.612 | 0.032±.029 | 20.980±3.090 | 3.421±1.258 | 52.414±6.298 | 0.002±.001 |
| Kidney     | 0.329±.010 | 1.585±.263   | 0.039±.006 | 0.853±.114   | 0.145±.018  | 0.166±.060   | 0.005±.001 |
| Large Int. | 0.012±.003 | 0.183±.010   | 0.004±.002 | 0.190±.103   | 0.154±.104  | 0.062±.008   | 0.001±.001 |
| Muscle     | 0.079±.048 | 0.677±.125   | 0.013±.003 | 0.617±.208   | 0.041±.016  | 0.020±.006   | 0.009±.005 |
| Brain      | 0.013±.002 | 0.188±.081   | 0.002±.001 | 0.147±.099   | 0.044±.012  | 0.087±.019   | 0.003±.002 |
| Ovary      | 0.053±.004 | 0.305±.156   | 0.007±.003 | 0.831±.129   | 0.025±.010  | 0.051±.023   | 0.008±.006 |

Values represent mean±SEM gc/cell, n=3
